# Supplementary material for: Parametrization consequences of constraining soil organic matter models by total carbon and radiocarbon using long-term field data
Source: Copernicus journal article supplement (doi:10.5194/bg-13-3003-2016), 2016-05-23

Supplement of Biogeosciences, 13, 3003–3019, 2016  
<http://www.biogeosciences.net/13/3003/2016/>  
doi:10.5194/bg-13-3003-2016-supplement  
© Author(s) 2016. CC Attribution 3.0 License.

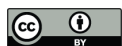

Biogeosciences  Open Access

*Supplement of*

## **Parametrization consequences of constraining soil organic matter models by total carbon and radiocarbon using long-term field data**

**Lorenzo Menichetti et al.**

*Correspondence to:* L. Menichetti (ilmenichetti@gmail.com)

The copyright of individual parts of the supplement might differ from the CC-BY 3.0 licence.

**S1: Effect of the weighting parameter on the variance defining the probability distribution of the two data streams.**

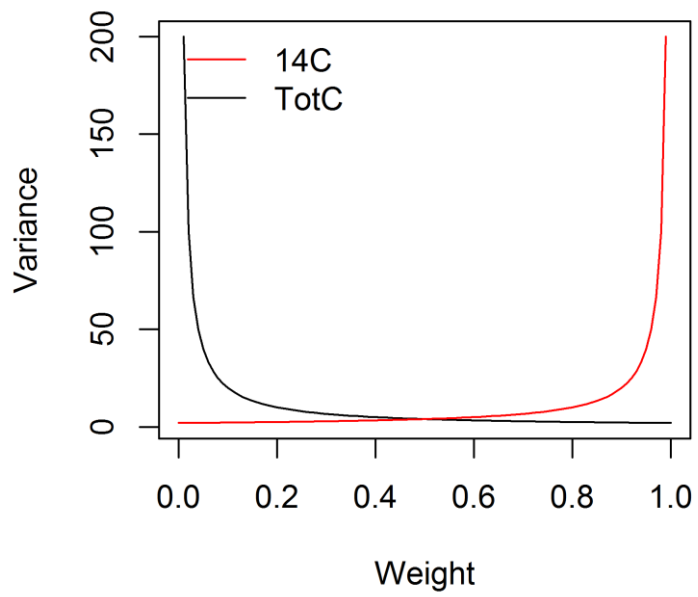

**S2: Value (dimensionless) took by the climatic parameter  $r$  (Eq. 9) over the simulation. The shaded area represents the parameter uncertainty.**

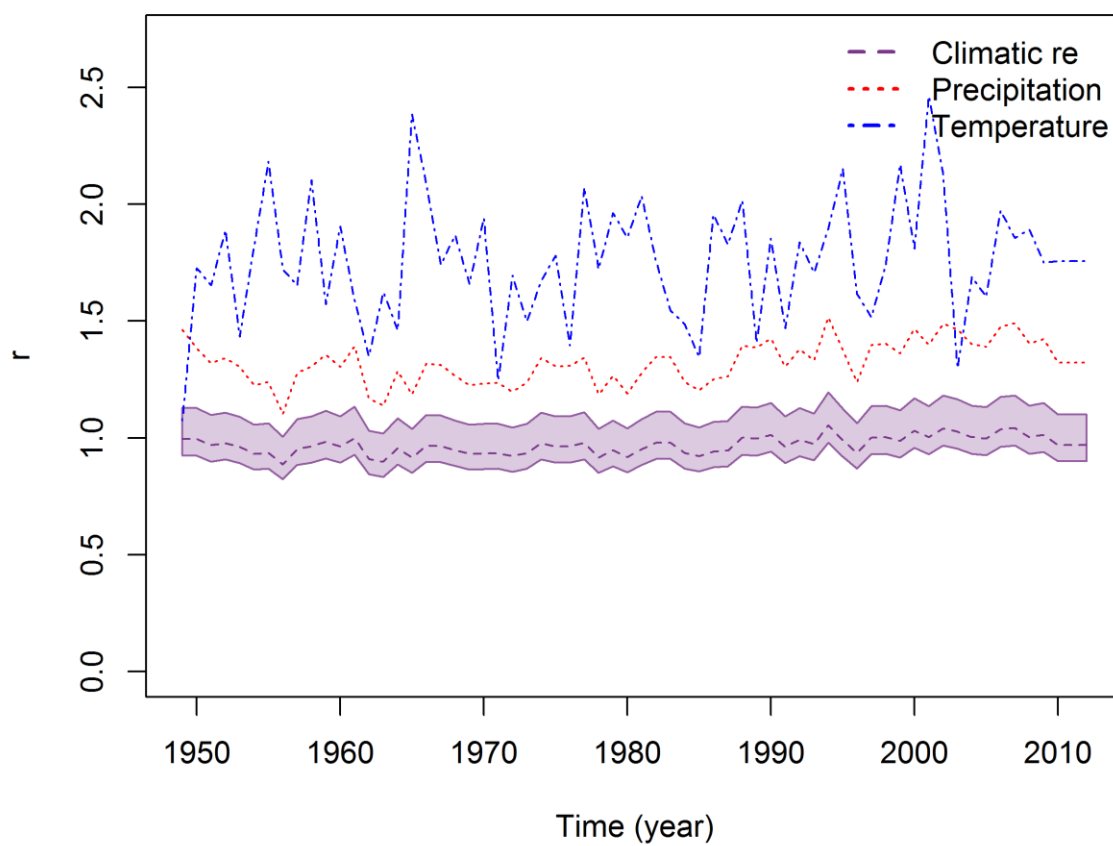

**S3: Coefficient of variation of all the parameters (average) among all the three treatments for the five model structures with the variation of the relative weight of  $SO^{14}C$  over total C. In this scale 1 means only total C, 0 means only  $SO^{14}C$ .**

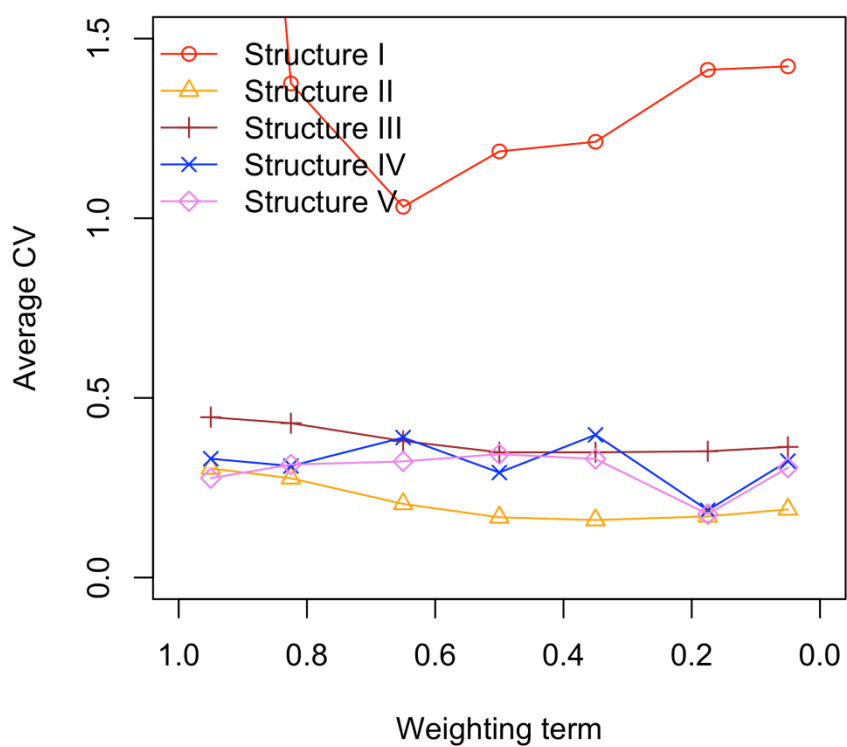

**S4: The posterior probability density (vertical axis) for the input error term (dimensionless, horizontal axis) for model structure I, II, II, IV and V.**

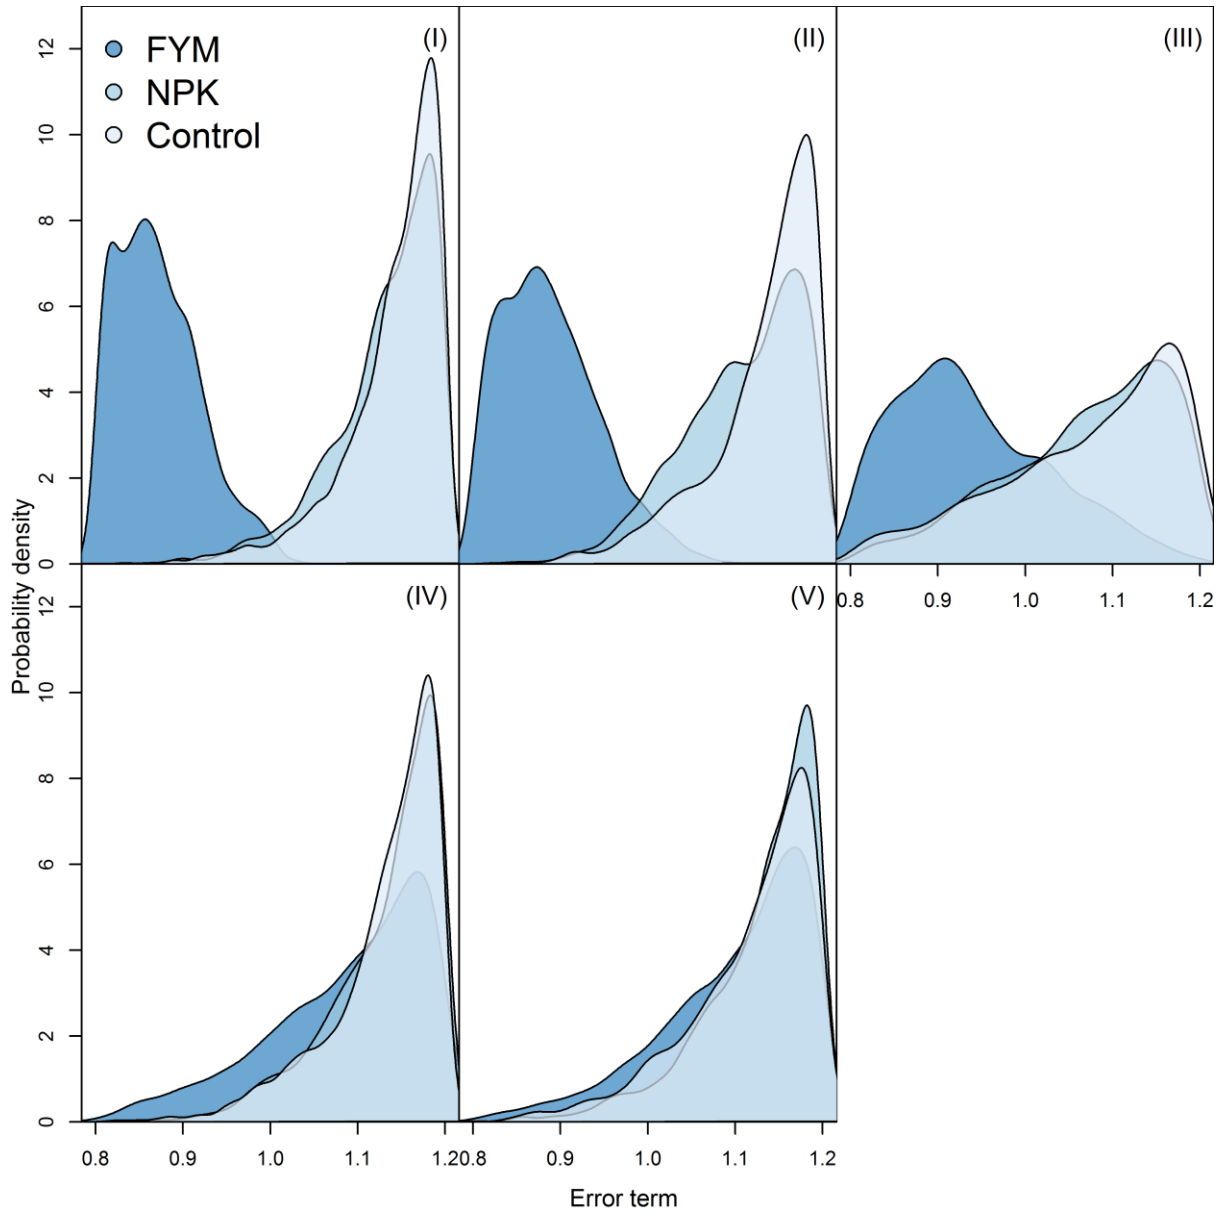

**S5: Simulation of SOC pools in the ZOFÉ trial as described by model structure III, with weighting factor = 0.35. Error bars represent the measured (black) and estimated (dark grey) standard error of the measurements. SOC (A,C,E) is in  $\text{Mg ha}^{-1}$ , while  $\text{SO}^{14}\text{C}$  (B, D, F) is in pMC.**

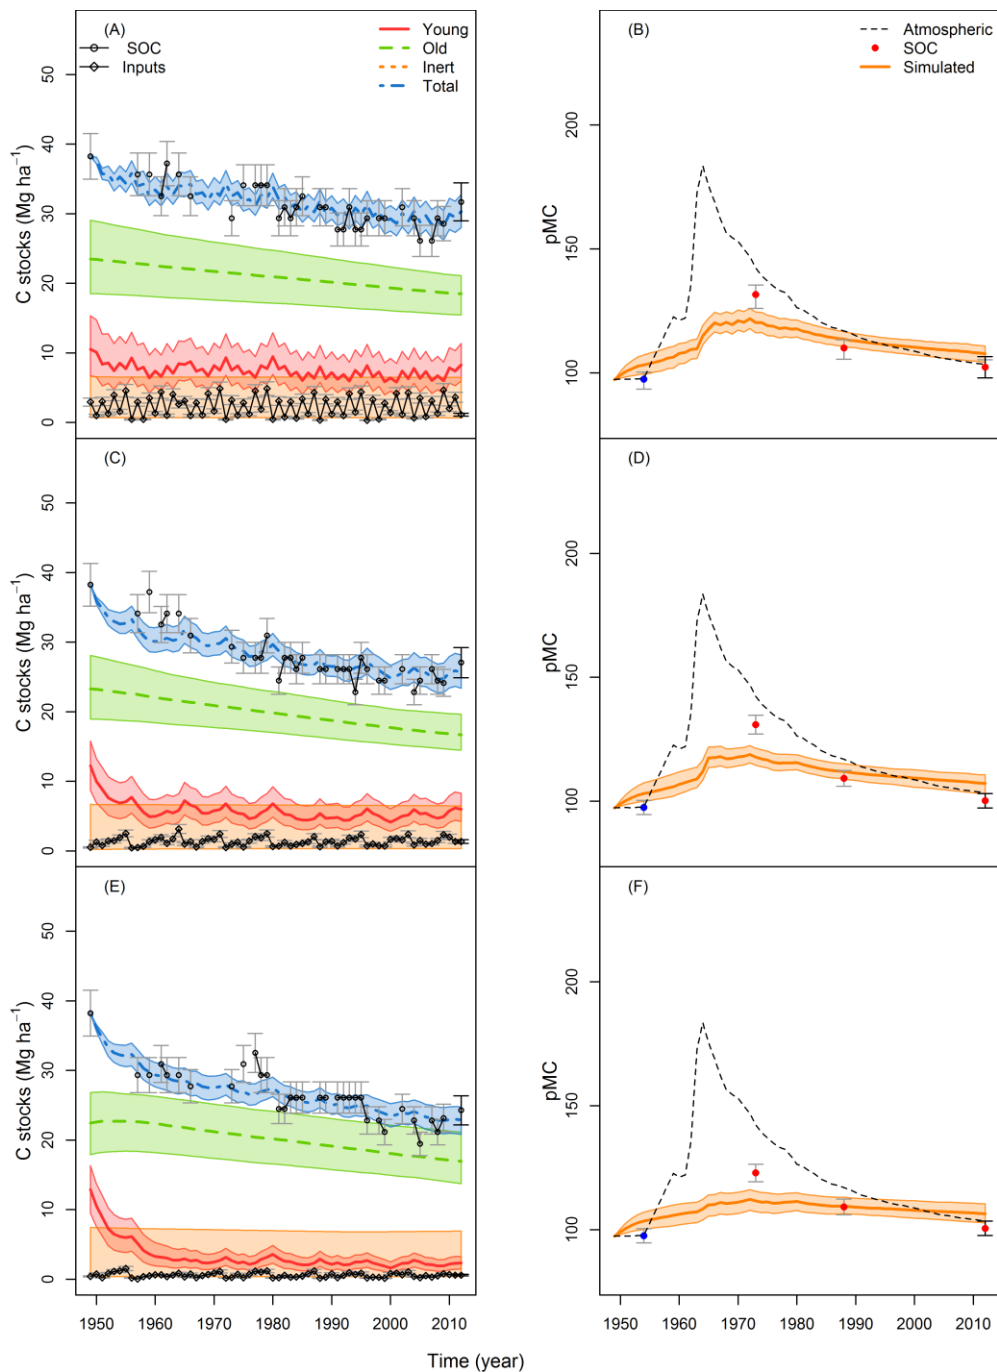

**S6: Simulation of SOC pools in the ZOFÉ trial as described by model structure IV, with weighting factor = 0.35. Error bars represent the measured (black) and estimated (dark grey) standard error of the measurements. SOC (A,C,E) is in  $\text{Mg ha}^{-1}$ , while  $\text{SO}^{14}\text{C}$  (B, D, F) is in pMC.**

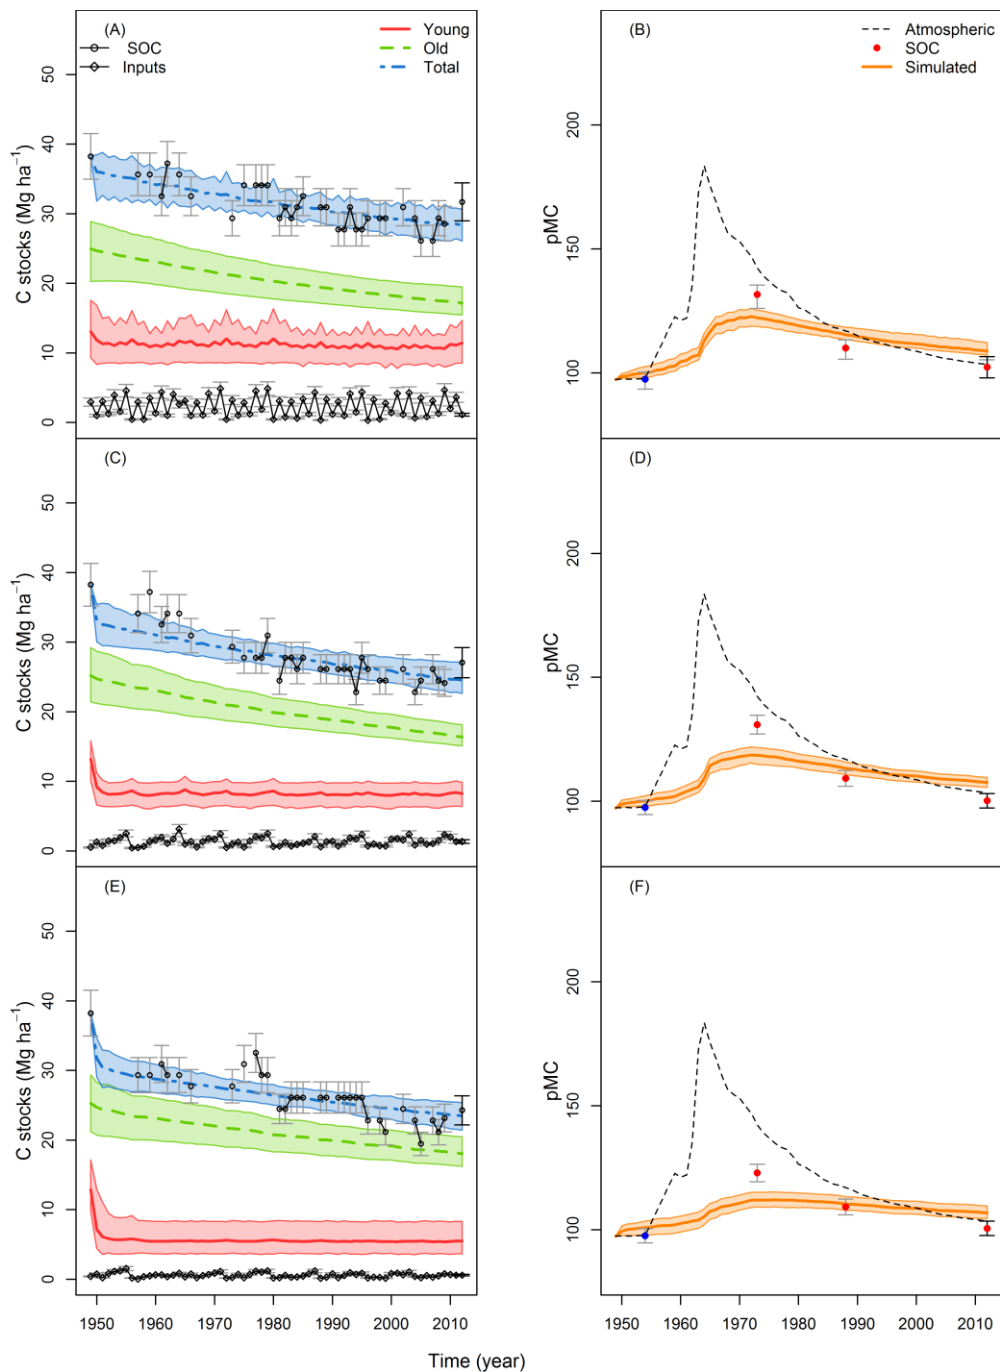

**S7: Simulation of SOC pools in the ZOFE trial as described by model structure V, with weighting factor = 0.35. Error bars represent the measured (black) and estimated (dark grey) standard error of the measurements. SOC (A,C,E) is in  $\text{Mg ha}^{-1}$ , while  $\text{SO}^{14}\text{C}$  (B, D, F) is in pMC.**

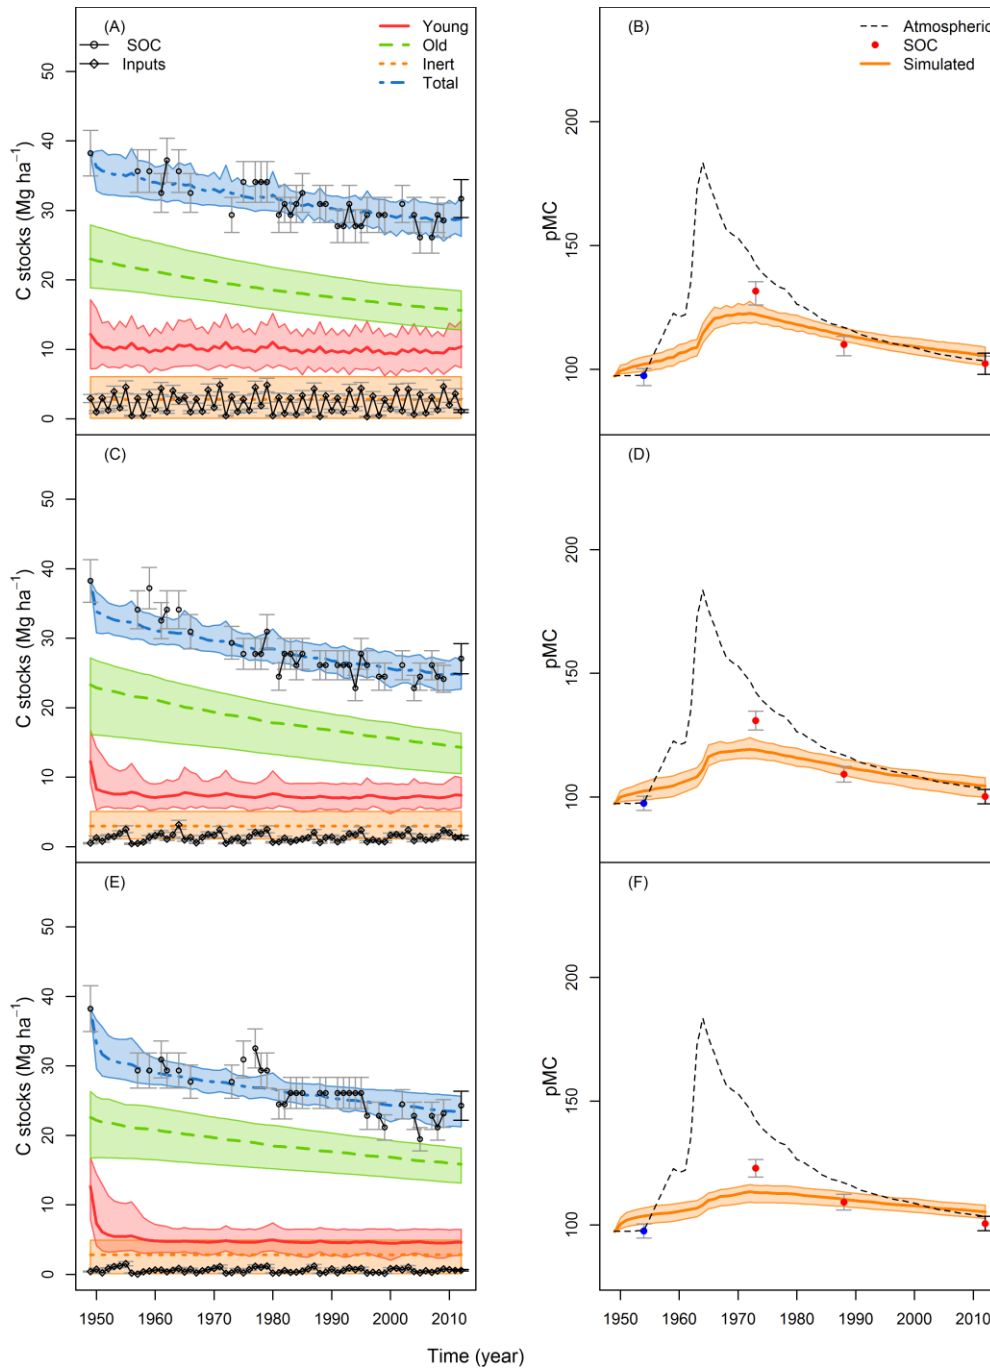



**S8: Graphical abstract of model structure I**

Model  
Structure I

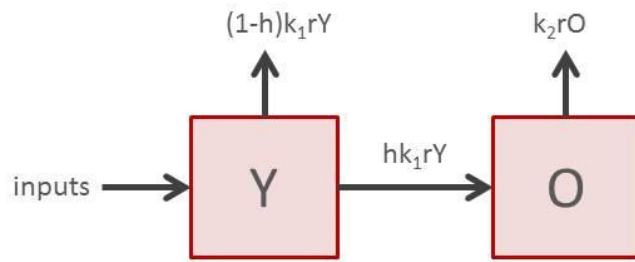

S9: Graphical abstract of model structure II

Model  
Structure II

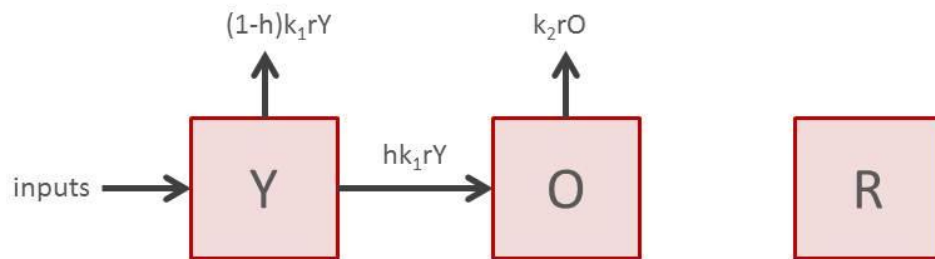

**S10: Graphical abstract of model structure III**

**Model  
Structure III**

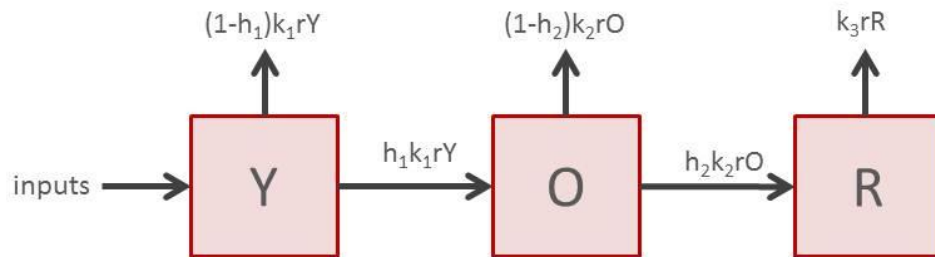

S11: Graphical abstract of model structure IV

# Model Structure IV

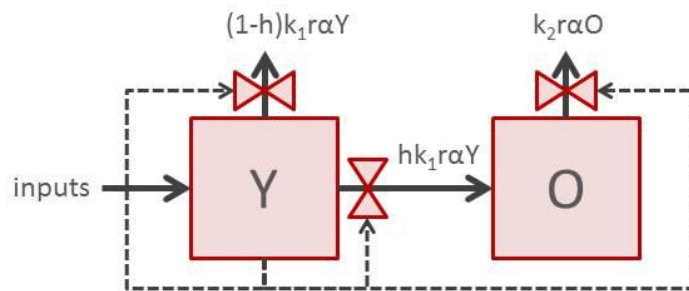

S12: Graphical abstract of model structure V

Model  
Structure IV

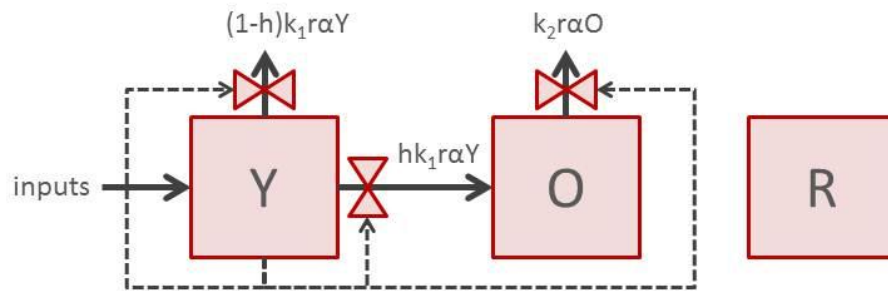

Supplement: Supplementary file 1 [file bg-13-3003-2016-supplement.pdf]
